# Supplementary material
Source: PubMed Central journal article supplement (PMC10147955)
Supplement: NIHMS1860019-supplement-1.pdf [file NIHMS1860019-supplement-1.pdf]

**Peanut Equivalent**  
**300 mg Peanut Protein**  
**Limited MILK**

**Approval is required to use other peanut foods.**

Please use the specific brands listed on this form. Protein content can vary between brands.

| <p align="center"><b>Consume one of these foods every day.</b></p> <p align="center">The amount listed is the <b>MINIMUM</b> amount to eat.</p> <p align="center">Many ingredients contribute to the total protein content of a food. The amount to eat is based on the <i>specific allergen protein</i> content and not the total protein content.</p> |                                                                                     | <p align="center"><b>Amount to eat</b></p>                                                                                                                                                                                                                                                                                                                                                                         |
|---------------------------------------------------------------------------------------------------------------------------------------------------------------------------------------------------------------------------------------------------------------------------------------------------------------------------------------------------------|-------------------------------------------------------------------------------------|--------------------------------------------------------------------------------------------------------------------------------------------------------------------------------------------------------------------------------------------------------------------------------------------------------------------------------------------------------------------------------------------------------------------|
| <p><b>Peanut Butter*</b><br/>Skippy or Jif</p>                                                                                                                                                                                                                                                                                                          |    | <p align="center">¼ teaspoon</p>                                                                                                                                                                                                                                                                                                                                                                                   |
| <p><b>Peanut butter*</b><br/>Teddie Organic All Natural Creamy</p>                                                                                                                                                                                                                                                                                      |   | <p align="center">¼ teaspoon</p> <p>You will need to stir this product before using and then refrigerate, as the oil will separate from the nut butter and make measuring the serving size more difficult.</p>                                                                                                                                                                                                     |
| <p><b>Peanuts*</b><br/>Planters Cocktail<br/>or<br/>Hampton Farms Peanuts<br/>in the shell<br/>(NOT Jumbo size)</p> <p>Peanuts can be eaten with or without the skin.</p>                                                                                                                                                                               |  |  <div style="border: 1px solid black; padding: 2px; width: fit-content; margin: 5px auto;">Whole peanut</div> <div style="border: 1px solid black; padding: 2px; width: fit-content; margin: 5px auto;">Half peanut</div> <p align="center">1 and ½ peanuts<br/>(Choose 1 whole + 1 half peanut <b>OR</b> 3 half peanuts)</p> |
| <p><b>Peanut Flour</b><br/>Golden or Byrd Mill<br/>12% Light Roast</p>                                                                                                                                                                                                                                                                                  |  | <p align="center">1/3 teaspoon</p>                                                                                                                                                                                                                                                                                                                                                                                 |

**Peanut Equivalent  
300 mg Peanut Protein  
Limited MILK**

|                                                                                                                                                                                                                                                                                                                                                             |                                                                                   |                                        |
|-------------------------------------------------------------------------------------------------------------------------------------------------------------------------------------------------------------------------------------------------------------------------------------------------------------------------------------------------------------|-----------------------------------------------------------------------------------|----------------------------------------|
| <p align="center"><b>Bamba</b><br/>Osem brand</p>                                                                                                                                                                                                                                                                                                           |  | <p align="center">3 pieces</p>         |
| <p align="center"><b>PB2</b><br/>Powdered Peanut Butter<br/>Original PB2 and Organic PB2</p>                                                                                                                                                                                                                                                                |  | <p align="center">1/3 teaspoon</p>     |
| <p align="center"><b>Reese's Pieces</b><br/>Candies<br/>**CONTAINS MILK</p>                                                                                                                                                                                                                                                                                 |  | <p align="center">4 Reese's Pieces</p> |
| <p><b>*Whole peanuts and clumps of peanut butter may be choking hazards. Peanut butter may be thinned for safety.</b><br/> <b>**About Reese's Pieces:</b> Reese's Pieces may be eaten if you are milk allergic but eating at least 300mg of milk protein daily as part of this study. Reese's pieces will not count as part of your daily milk serving.</p> |                                                                                   |                                        |

**Read**

- Read product labels every time you purchase an item. Ingredients and precautionary labeling may change at any time. Please inform the study staff if you notice any label changes in the products listed.

**Avoid**

- Continue to read product labels (ingredients, contains statements, and precautionary allergen labels) to avoid any additional allergens.

**Serving Suggestions**

- Peanut portion may be mixed with other foods (e.g., applesauce, smoothies, or pudding) or cooked in other foods (e.g., cookies, meatballs, muffins, pasta sauce, or chili). Tolerated mix-ins such as dry cereal, granola, fruit, coconut flakes, chocolate chips, graham cracker crumbs, etc. may be added to mask the texture, if needed.
- Chocolate or strawberry syrup may be added to foods for flavoring.

**You May Also Eat**

- You may eat products labeled with peanut precautionary allergen labeling as long as they do not contain any of your other allergens. Example labels include, "May contain peanut" and "Manufactured in a facility that also processes peanut."

**Peanut Equivalent**  
**600 mg Peanut Protein**  
**Limited MILK**

**Approval is required to use other peanut foods.**

Please use the specific brands listed on this form. Protein content can vary between brands.

| <p align="center"><b>Consume one of these foods every day.</b></p> <p align="center">The amount listed is the <b>MAXIMUM</b> amount to eat.</p> <p align="center">Many ingredients contribute to the total protein content of a food. The amount to eat is based on the <i>specific allergen protein</i> content and not the total protein content.</p> |                                                                                     | <b>Amount to eat</b>                                                                                                                                                                                                                                                                                                                          |
|---------------------------------------------------------------------------------------------------------------------------------------------------------------------------------------------------------------------------------------------------------------------------------------------------------------------------------------------------------|-------------------------------------------------------------------------------------|-----------------------------------------------------------------------------------------------------------------------------------------------------------------------------------------------------------------------------------------------------------------------------------------------------------------------------------------------|
| <p><b>Peanut Butter*</b><br/>Skippy or Jif</p>                                                                                                                                                                                                                                                                                                          |    | <p>½ teaspoon</p>                                                                                                                                                                                                                                                                                                                             |
| <p><b>Peanut butter*</b><br/>Teddie Organic All Natural Creamy</p>                                                                                                                                                                                                                                                                                      |   | <p align="center">½ teaspoon</p> <p>You will need to stir this product before using and then refrigerate, as the oil will separate from the nut butter and make measuring the serving size more difficult.</p>                                                                                                                                |
| <p><b>Peanuts*</b><br/>Planters Cocktail<br/>or<br/>Hampton Farms Peanuts in the shell<br/>(NOT Jumbo size)</p> <p>Peanuts can be eaten with or without the skin.</p>                                                                                                                                                                                   |  | <div style="text-align: center;">  <p>Whole peanut</p> </div> <div style="text-align: center;"> <p>Half peanut</p> </div> <p>2 and ½ peanuts<br/>           You may choose any combination of half peanuts and whole peanuts that will = 2 ½ peanuts</p> |
| <p><b>Peanut Flour</b><br/>Golden or Byrd Mill<br/>12% Light Roast</p>                                                                                                                                                                                                                                                                                  |  | <p>2/3 teaspoon</p>                                                                                                                                                                                                                                                                                                                           |

**Peanut Equivalent  
600 mg Peanut Protein  
Limited MILK**

|                                                                                                                                                                                                                                                                                                                                                             |                                                                                   |                                        |
|-------------------------------------------------------------------------------------------------------------------------------------------------------------------------------------------------------------------------------------------------------------------------------------------------------------------------------------------------------------|-----------------------------------------------------------------------------------|----------------------------------------|
| <p align="center"><b>Bamba</b><br/>Osem brand</p>                                                                                                                                                                                                                                                                                                           |  | <p align="center">6 pieces</p>         |
| <p align="center"><b>PB2</b><br/>Powdered Peanut Butter<br/>Original PB2 and Organic PB2</p>                                                                                                                                                                                                                                                                |  | <p align="center">2/3 teaspoon</p>     |
| <p align="center"><b>Reese's Pieces</b><br/>Candies<br/>**CONTAINS MILK</p>                                                                                                                                                                                                                                                                                 |  | <p align="center">7 Reese's Pieces</p> |
| <p><b>*Whole peanuts and clumps of peanut butter may be choking hazards. Peanut butter may be thinned for safety.</b><br/> <b>**About Reese's Pieces:</b> Reese's Pieces may be eaten if you are milk allergic but eating at least 300mg of milk protein daily as part of this study. Reese's pieces will not count as part of your daily milk serving.</p> |                                                                                   |                                        |

**Read**

- Read product labels every time you purchase an item. Ingredients and precautionary labeling may change at any time. Please inform the study staff if you notice any label changes in the products listed.

**Avoid**

- Continue to read product labels (ingredients, contains statements, and precautionary allergen labels) to avoid any additional allergens.

**Serving Suggestions**

- Peanut portion may be mixed with other foods (e.g., applesauce, smoothies, or pudding) or cooked in other foods (e.g., cookies, meatballs, muffins, pasta sauce, or chili). Tolerated mix-ins such as dry cereal, granola, fruit, coconut flakes, chocolate chips, graham cracker crumbs, etc. may be added to mask the texture, if needed.
- Chocolate or strawberry syrup may be added to foods for flavoring.

**You May Also Eat**

- You may eat products labeled with peanut precautionary allergen labeling as long as they do not contain any of your other allergens. Example labels include, "May contain peanut" and "Manufactured in a facility that also processes peanut."

**Peanut Equivalent**  
**1000 mg Peanut Protein**  
**Limited MILK**

**Approval is required to use other peanut foods.**

Please use the specific brands listed on this form. Protein content can vary between brands.

| <p align="center"><b>Consume one of these foods every day.</b></p> <p align="center">The amount listed is the <b>MAXIMUM</b> amount to eat.</p> <p align="center">Many ingredients contribute to the total protein content of a food. The amount to eat is based on the <i>specific allergen protein</i> content and not the total protein content.</p> |                                                                                     | <b>Amount to eat</b>                                                                                                                                                                                                                |
|---------------------------------------------------------------------------------------------------------------------------------------------------------------------------------------------------------------------------------------------------------------------------------------------------------------------------------------------------------|-------------------------------------------------------------------------------------|-------------------------------------------------------------------------------------------------------------------------------------------------------------------------------------------------------------------------------------|
| <p align="center"><b>Peanut Butter*</b><br/>Skippy or Jif</p>                                                                                                                                                                                                                                                                                           |    | 1 teaspoon                                                                                                                                                                                                                          |
| <p align="center"><b>Peanut butter*</b><br/>Teddie Organic All Natural Creamy</p>                                                                                                                                                                                                                                                                       |   | <p>3/4 teaspoon</p> <p>You will need to stir this product before using and then refrigerate, as the oil will separate from the nut butter and make measuring the serving size more difficult.</p>                                   |
| <p align="center"><b>Peanuts*</b><br/>Planters Cocktail<br/>or<br/>Hampton Farms Peanuts<br/>in the shell<br/>(NOT Jumbo size)</p> <p>Peanuts can be eaten with or without the skin.</p>                                                                                                                                                                |  |  <p>Whole peanut</p> <p>Half peanut</p> <p>4 and ½ peanuts<br/>You may choose any combination of half and whole peanuts that = 4 ½ peanuts</p> |
| <p align="center"><b>Peanut Flour</b><br/>Golden or Byrd Mill<br/>12% Light Roast</p>                                                                                                                                                                                                                                                                   |  | 1 teaspoon                                                                                                                                                                                                                          |

**Peanut Equivalent  
1000 mg Peanut Protein  
Limited MILK**

|                                                                                                    |                                                                                    |                                         |
|----------------------------------------------------------------------------------------------------|------------------------------------------------------------------------------------|-----------------------------------------|
| <p align="center"><b>Bamba</b><br/>Osem brand</p>                                                  |   | <p align="center">10 pieces</p>         |
| <p align="center"><b>PB2</b><br/>Powdered Peanut Butter<br/>Original PB2 and Organic PB2</p>       |   | <p align="center">1 teaspoon</p>        |
| <p align="center"><b>Reese's Pieces</b><br/>Candies<br/>**CONTAINS MILK</p>                        |   | <p align="center">12 Reese's Pieces</p> |
| <p align="center"><b>Peanut Butter Bites</b><br/>Pasokin Brand<br/><i>Original flavor only</i></p> |  | <p align="center">½ piece</p>           |

**\*Whole peanuts and clumps of peanut butter may be choking hazards. Peanut butter may be thinned for safety.**

**\*\*About Reese's Pieces:** Reese's Pieces may be eaten if you are milk allergic but eating at least 300mg of milk protein daily as part of this study. Reese's pieces will not count as part of your daily milk serving.

**Read**

- Read product labels every time you purchase an item. Ingredients and precautionary labeling may change at any time. Please inform the study staff if you notice any label changes in the products listed.

**Avoid**

- Continue to read product labels (ingredients, contains statements, and precautionary allergen labels) to avoid any additional allergens.

**Serving Suggestions**

- Peanut portion may be mixed with other foods (e.g., applesauce, smoothies, or pudding) or cooked in other foods (e.g., cookies, meatballs, muffins, pasta sauce, or chili). Tolerated mix-ins such as dry cereal, granola, fruit, coconut flakes, chocolate chips, graham cracker crumbs, etc. may be added to mask the texture, if needed.
- Chocolate or strawberry syrup may be added to foods for flavoring.

**Peanut Equivalent  
1000 mg Peanut Protein  
Limited MILK**

**You May Also Eat**

- You may eat products labeled with peanut precautionary allergen labeling as long as they do not contain any of your other allergens. Example labels include, “May contain peanut” and “Manufactured in a facility that also processes peanut.”

**Peanut Equivalent**  
**2000 mg Peanut Protein**  
**Limited MILK**

**Approval is required to use other peanut foods.**

Please use the specific brands listed on this form. Protein content can vary between brands.

| <p align="center"><b>Consume one of these foods every day.</b></p> <p align="center">The amount listed is the <b>MAXIMUM</b> amount to eat.</p> <p align="center">Many ingredients contribute to the total protein content of a food. The amount to eat is based on the <i>specific allergen protein</i> content and not the total protein content.</p> |                                                                                     | <p align="center"><b>Amount to eat</b></p>                                                                                                                                                                                                                                                                            |
|---------------------------------------------------------------------------------------------------------------------------------------------------------------------------------------------------------------------------------------------------------------------------------------------------------------------------------------------------------|-------------------------------------------------------------------------------------|-----------------------------------------------------------------------------------------------------------------------------------------------------------------------------------------------------------------------------------------------------------------------------------------------------------------------|
| <p align="center"><b>Peanut Butter*</b></p> <p align="center">Skippy or Jif</p>                                                                                                                                                                                                                                                                         |    | <p>1 and <math>\frac{3}{4}</math> teaspoon</p>                                                                                                                                                                                                                                                                        |
| <p align="center"><b>Peanut butter*</b></p> <p align="center">Teddie Organic All Natural Creamy</p>                                                                                                                                                                                                                                                     |   | <p align="center">1 and <math>\frac{1}{2}</math> teaspoon</p> <p align="center">You will need to stir this product before using and then refrigerate, as the oil will separate from the nut butter and make measuring the serving size more difficult.</p>                                                            |
| <p align="center"><b>Peanuts*</b></p> <p align="center">Planters Cocktail<br/>or<br/>Hampton Farms Peanuts<br/>in the shell<br/>(NOT Jumbo size)</p> <p align="center">Peanuts can be eaten with or without the skin.</p>                                                                                                                               |  | <div style="text-align: center;">  <p align="right">Whole peanut</p> <p align="left">Half peanut</p> </div> <p align="center">9 peanuts<br/>You may choose half peanuts or whole peanuts or any combination that = 9 peanuts</p> |



**Peanut Equivalent  
2000 mg Peanut Protein  
Limited MILK**

|                                                                                                    |                                                                                     |                                         |
|----------------------------------------------------------------------------------------------------|-------------------------------------------------------------------------------------|-----------------------------------------|
| <p align="center"><b>Peanut Flour</b><br/>Golden or Byrd Mill<br/>12% Light Roast</p>              |    | <p align="center">2 teaspoons</p>       |
| <p align="center"><b>Bamba</b><br/>Osem brand</p>                                                  |    | <p align="center">21 pieces</p>         |
| <p align="center"><b>PB2</b><br/>Powdered Peanut Butter<br/>Original PB2 and Organic PB2</p>       |    | <p align="center">2 teaspoons</p>       |
| <p align="center"><b>Reese's Pieces</b><br/>Candies<br/><b>**CONTAINS MILK</b></p>                 |    | <p align="center">24 Reese's Pieces</p> |
| <p align="center"><b>Peanut Butter Bites</b><br/>Pasokin Brand<br/><i>Original flavor only</i></p> |  | <p align="center">1 piece</p>           |

**\*Whole peanuts and clumps of peanut butter may be choking hazards. Peanut butter may be thinned for safety.**

**\*\*About Reese's Pieces:** Reese's Pieces may be eaten if you are milk allergic but eating at least 300mg of milk protein daily as part of this study. Reese's pieces will not count as part of your daily milk serving.

**Read**

- Read product labels every time you purchase an item. Ingredients and precautionary labeling may change at any time. Please inform the study staff if you notice any label changes in the products listed.

**Avoid**

- Continue to read product labels (ingredients, contains statements, and precautionary allergen labels) to avoid any additional allergens.

**Peanut Equivalent**  
**2000 mg Peanut Protein**  
**Limited MILK**

**Serving Suggestions**

- Peanut portion may be mixed with other foods (e.g., applesauce, smoothies, or pudding) or cooked in other foods (e.g., cookies, meatballs, muffins, pasta sauce, or chili). Tolerated mix-ins such as dry cereal, granola, fruit, coconut flakes, chocolate chips, graham cracker crumbs, etc. may be added to mask the texture, if needed.
- Chocolate or strawberry syrup may be added to foods for flavoring.
- Use a variety of foods to meet your daily serving goals. Choosing only candy, sweet spreads, cookies, and other “treats” is not appropriate to meet serving goals at higher serving sizes. When you eat these foods, eat them as a portion of your daily serving. Choose healthier options as much as possible.

**You May Also Eat**

- You may eat products labeled with peanut precautionary allergen labeling as long as they do not contain any of your other allergens. Example labels include, “May contain peanut” and “Manufactured in a facility that also processes peanut.”

**Peanut Equivalent**  
**4000 mg Peanut Protein**  
**Limited MILK**

**Approval is required to use other peanut foods.**

Please use the specific brands listed on this form. Protein content can vary between brands.

| <p align="center"><b>Consume one of these foods every day.</b></p> <p align="center">The amount listed is the <b>MAXIMUM</b> amount to eat.</p> <p align="center">Many ingredients contribute to the total protein content of a food. The amount to eat is based on the <i>specific allergen protein</i> content and not the total protein content.</p> |                                                                                     | <p align="center"><b>Amount to eat</b></p>                                                                                                                                                                                                                                          |
|---------------------------------------------------------------------------------------------------------------------------------------------------------------------------------------------------------------------------------------------------------------------------------------------------------------------------------------------------------|-------------------------------------------------------------------------------------|-------------------------------------------------------------------------------------------------------------------------------------------------------------------------------------------------------------------------------------------------------------------------------------|
| <p align="center"><b>Peanut Butter*</b></p> <p align="center">Skippy or Jif</p>                                                                                                                                                                                                                                                                         |    | <p align="center">1 Tablespoon<br/>plus ½ teaspoon</p>                                                                                                                                                                                                                              |
| <p align="center"><b>Peanut butter*</b></p> <p align="center">Teddie Organic All Natural Creamy</p>                                                                                                                                                                                                                                                     |   | <p align="center">1 Tablespoon</p> <p>You will need to stir this product before use and then refrigerate, as the oil will separate from the nut butter and make measuring the serving size more difficult.</p>                                                                      |
| <p align="center"><b>Peanuts*</b></p> <p align="center">Planters Cocktail</p> <p>Peanuts can be eaten with or without the skin.</p>                                                                                                                                                                                                                     |  |  <p align="center">Whole peanut</p> <p align="center">Half peanut</p> <p align="center">18 peanuts</p> <p>You may choose half peanuts or whole peanuts or any combination that =18 peanuts</p> |

**Peanut Equivalent**  
**4000 mg Peanut Protein**  
**Limited MILK**

|                                                                                                      |                                                                                     |                                                                                                                                  |
|------------------------------------------------------------------------------------------------------|-------------------------------------------------------------------------------------|----------------------------------------------------------------------------------------------------------------------------------|
| <p align="center"><b>Peanuts *</b><br/> Hampton Farms in the shell<br/> (NOT Jumbo size)</p>         |    | <p align="center">17 peanuts<br/> You may choose half peanuts<br/> or whole peanuts or any<br/> combination that =17 peanuts</p> |
| <p align="center"><b>Peanut Flour</b><br/> Golden or Byrd Mill<br/> 12% Light Roast</p>              |    | <p align="center">1 Tablespoon plus 1<br/> teaspoon</p>                                                                          |
| <p align="center"><b>Bamba</b><br/> Osem brand</p>                                                   |    | <p align="center">42 pieces</p>                                                                                                  |
| <p align="center"><b>PB2</b><br/> Powdered Peanut Butter<br/> Original PB2 and Organic PB2</p>       |   | <p align="center">1 Tablespoon plus 1 teaspoon</p>                                                                               |
| <p align="center"><b>Reese's Pieces</b><br/> Candies<br/> **CONTAINS MILK</p>                        |  | <p align="center">47 Reese's Pieces</p>                                                                                          |
| <p align="center"><b>Peanut Butter Bites</b><br/> Pasokin Brand<br/> <i>Original flavor only</i></p> |  | <p align="center">2 pieces</p>                                                                                                   |

**\*Whole peanuts and clumps of peanut butter may be choking hazards. Peanut butter may be thinned for safety.**

**\*\*About Reese's Pieces:** Reese's Pieces may be eaten if you are milk allergic but eating at least 300mg of milk protein daily as part of this study. Reese's pieces will not count as part of your daily milk serving.

**Read**

- Read product labels every time you purchase an item. Ingredients and precautionary labeling may change at any time. Please inform the study staff if you notice any label changes in the products listed.

**Peanut Equivalent**  
**4000 mg Peanut Protein**  
**Limited MILK**

**Avoid**

- Continue to read product labels (ingredients, contains statements, and precautionary allergen labels) to avoid any additional allergens.

**Serving Suggestions**

- Peanut portion may be mixed with other foods (e.g., applesauce, smoothies, or pudding) or cooked in other foods (e.g., cookies, meatballs, muffins, pasta sauce, or chili). Tolerated mix-ins such as dry cereal, granola, fruit, coconut flakes, chocolate chips, graham cracker crumbs, etc. may be added to mask the texture, if needed.
- Chocolate or strawberry syrup may be added to foods for flavoring.
- Use a variety of foods to meet your daily serving goals. Choosing only candy, sweet spreads, cookies, and other “treats” is not appropriate to meet serving goals at higher serving sizes. When you eat these foods, eat them as a portion of your daily serving. Choose healthier options as much as possible.

**You May Also Eat**

- You may eat products labeled with peanut precautionary allergen labeling as long as they do not contain any of your other allergens. Example labels include, “May contain peanut” and “Manufactured in a facility that also processes peanut.”

**Peanut Equivalent**  
**6000 mg Peanut Protein**  
**Limited MILK**

**Approval is required to use other peanut foods.**

Please use the specific brands listed on this form. Protein content can vary between brands.

| <p align="center"><b>Consume one of these foods every day.</b></p> <p align="center">The amount listed is the <b>MAXIMUM</b> amount to eat.</p> <p align="center">Many ingredients contribute to the total protein content of a food. The amount to eat is based on the <i>specific allergen protein</i> content and not the total protein content.</p> |                                                                                     | <p align="center"><b>Amount to eat</b></p>                                                                                                                                                                                                                 |
|---------------------------------------------------------------------------------------------------------------------------------------------------------------------------------------------------------------------------------------------------------------------------------------------------------------------------------------------------------|-------------------------------------------------------------------------------------|------------------------------------------------------------------------------------------------------------------------------------------------------------------------------------------------------------------------------------------------------------|
| <p align="center"><b>Peanut Butter*</b></p> <p align="center">Skippy or Jif</p>                                                                                                                                                                                                                                                                         |    | <p align="center">1 Tablespoon plus 2 teaspoons</p>                                                                                                                                                                                                        |
| <p align="center"><b>Peanut butter*</b></p> <p align="center">Teddie Organic All Natural Creamy</p>                                                                                                                                                                                                                                                     |   | <p align="center">1 Tablespoon plus 1 and 2/3 teaspoon</p> <p align="center">You will need to stir this product before use and then refrigerate, as the oil will separate from the nut butter and make measuring the serving size more difficult.</p>      |
| <p align="center"><b>Peanuts*</b></p> <p align="center">Planters Cocktail</p> <p align="center">Peanuts can be eaten with or without the skin.</p>                                                                                                                                                                                                      |  | <div align="center">  </div> <p align="center">27 peanuts</p> <p align="center">You may choose half peanuts or whole peanuts or any combination that = 27 peanuts</p> |

**Peanut Equivalent  
6000 mg Peanut Protein  
Limited MILK**

|                                                                                                    |                                                                                     |                                                                                                                        |
|----------------------------------------------------------------------------------------------------|-------------------------------------------------------------------------------------|------------------------------------------------------------------------------------------------------------------------|
| <p align="center"><b>Peanuts*</b><br/>Hampton Farms in the shell<br/>(NOT Jumbo size)</p>          |    | <p align="center">25 peanuts<br/>You may choose half peanuts or whole peanuts or any combination that = 25 peanuts</p> |
| <p align="center"><b>Peanut Flour</b><br/>Golden or Byrd Mill<br/>12% Light Roast</p>              |    | <p align="center">2 Tablespoons</p>                                                                                    |
| <p align="center"><b>Bamba</b><br/>Osem brand</p>                                                  |    | <p align="center">63 pieces</p>                                                                                        |
| <p align="center"><b>PB2</b><br/>Powdered Peanut Butter<br/>Original PB2 and Organic PB2</p>       |   | <p align="center">2 Tablespoons</p>                                                                                    |
| <p align="center"><b>Reese's Pieces</b><br/>Candies<br/>**CONTAINS MILK</p>                        |  | <p align="center">71 Reese's Pieces</p>                                                                                |
| <p align="center"><b>Peanut Butter Bites</b><br/>Pasokin Brand<br/><i>Original flavor only</i></p> |  | <p align="center">3 pieces</p>                                                                                         |

**\*Whole peanuts and clumps of peanut butter may be choking hazards. Peanut butter may be thinned for safety.**

**\*\*About Reese's Pieces:** Reese's Pieces may be eaten if you are milk allergic but eating at least 300mg of milk protein daily as part of this study. Reese's pieces will not count as part of your daily milk serving.

**Peanut Equivalent**  
**6000 mg Peanut Protein**  
**Limited MILK**

**Read**

- Read product labels every time you purchase an item. Ingredients and precautionary labeling may change at any time. Please inform the study staff if you notice any label changes in the products listed.

**Avoid**

- Continue to read product labels (ingredients, contains statements, and precautionary allergen labels) to avoid any additional allergens.

**Serving Suggestions**

- Peanut portion may be mixed with other foods (e.g., applesauce, smoothies, or pudding) or cooked in other foods (e.g., cookies, meatballs, muffins, pasta sauce, or chili). Tolerated mix-ins such as dry cereal, granola, fruit, coconut flakes, chocolate chips, graham cracker crumbs, etc. may be added to mask the texture, if needed.
- Chocolate or strawberry syrup may be added to foods for flavoring.
- Use a variety of foods to meet your daily serving goals. Choosing only candy, sweet spreads, cookies, and other “treats” is not appropriate to meet serving goals at higher serving sizes. When you eat these foods, eat them as a portion of your daily serving. Choose healthier options as much as possible.

**You May Also Eat**

- You may eat products labeled with peanut precautionary allergen labeling as long as they do not contain any of your other allergens. Example labels include, “May contain peanut” and “Manufactured in a facility that also processes peanut.”
