# Supplementary material
Source: PubMed Central journal article supplement (PMC10147955)
Supplement: NIHMS1860019-supplement-9.pdf [file NIHMS1860019-supplement-9.pdf]

Table E1. Wheat Food Protein Equivalents

| Food                                                                           | 300mg             | 600mg             | 1000mg                          | 2000mg                            | 4000mg                    | 6000mg                    |
|--------------------------------------------------------------------------------|-------------------|-------------------|---------------------------------|-----------------------------------|---------------------------|---------------------------|
| <b>Mini Pretzels</b><br>Snyder's                                               | 2 minis           | 4 minis           | 7 minis                         | 14 minis                          | 27 minis                  | 40 minis                  |
| <b>Pretzel Rod</b><br>Snyder's                                                 | 1/3 rod           | 3/5 rod           | 1 rod                           | 2 rods                            | 4 rods                    | 6 rods                    |
| <b>Saltine or Soda Crackers</b><br>Nabisco Original Premium                    | 1 cracker         | 2 crackers        | 3 and ½ crackers                | 6 and ½ crackers                  | 13 crackers               | 20 crackers               |
| <b>Whole Wheat Ritz Crackers</b><br>Ritz                                       | 1 and ½ crackers  | 3 crackers        | 5 crackers                      | 10 crackers                       | 20 crackers               | 30 crackers               |
| <b>Oyster Crackers</b><br>Nabisco Premium Soup and Oyster Crackers             | 5 crackers        | 9 crackers        | 16 crackers                     | 31 crackers                       | 62 crackers               | 92 crackers               |
| <b>Graham Crackers*</b><br>Nabisco Honey Maid Graham Crackers                  | 1 and ¼ crackers  | 2 and ½ crackers  | 4 crackers<br>(1 sheet)         | 8 crackers<br>(2 sheets)          | 16 crackers<br>(4 sheets) | 24 crackers<br>(6 sheets) |
| <b>Wheat Chex</b><br>General Mills                                             | 6 pieces          | 12 pieces         | 21 pieces                       | 41 pieces<br>(1/3 cup)            | 82 pieces<br>(2/3 cup)    | 122 pieces<br>(1 cup)     |
| <b>Shredded Wheat (mini)</b><br>Kellogg's frosted mini wheats                  | 1 and ½ minis     | 3 minis           | 5 minis                         | 10 minis                          | 20 minis                  | 30 minis                  |
| <b>White Bread (3g pro/slice)</b><br>Freihofer's Country White                 | 1/10 slice        | 1/5 slice         | 1/3 slice                       | 2/3 slice                         | 1 and 1/3 slice           | 2 slices                  |
| <b>Whole Wheat Bread (4g pro/slice)</b><br>Nature's Own 100% Whole Wheat Bread | 1/12 slice        | 1/7 slice         | ¼ slice                         | ½ slice                           | 1 slice                   | 1 and ½ slices            |
| <b>Elbow Pasta</b><br>DeCecco Dry Elbow Pasta no. 81                           | 10 elbows         | 19 elbows         | 32 elbows                       | 63 elbows<br>(¼ cup cooked)       | 125 elbows<br>(½ cup)     | 188 elbows<br>(¾ cup)     |
| <b>Spaghetti</b><br>DeCecco Dry Spaghetti no. 12                               | 2 spaghetti       | 4 spaghetti       | 7 spaghetti                     | 13 spaghetti                      | 25 spaghetti              | 38 spaghetti              |
| <b>Wheat Flour</b><br>Pillsbury All Purpose Flour                              | 1 and ¼ teaspoons | 2 and ½ teaspoons | 1 Tablespoon<br>plus 1 teaspoon | 2 Tablespoons<br>plus 2 teaspoons | 1/3 cup                   | ½ cup                     |
| <b>Whole Wheat Flour</b><br>King Arthur 100% Whole Wheat                       | 1 teaspoon        | 1 and ¾ teaspoons | 1 Tablespoon                    | 2 Tablespoons<br>plus ¼ teaspoon  | ¼ cup                     | 6 Tablespoons             |

\*One rectangular sheet = 4 crackers.

Table E2. Walnut Food Protein Equivalents

| Food                                  | 300mg                         | 600mg                         | 1000mg                           | 2000mg                           | 4000mg                                   | 6000mg                     |
|---------------------------------------|-------------------------------|-------------------------------|----------------------------------|----------------------------------|------------------------------------------|----------------------------|
| <b>Walnuts</b><br>Generic             | 1 walnut half                 | 2 walnut halves               | 3 walnut halves                  | 7 walnut halves                  | 13 walnut halves                         | 20 walnut halves           |
| <b>Walnuts</b><br>Primavera           | 3/4 walnut half               | 1 and ½ walnut halves         | 2 and 1/2 walnut halves          | 4 and 1/2 walnut halves          | 9 walnut halves                          | 14 walnut halves           |
| <b>Walnut Butter</b><br>Crazy Go Nuts | 1/2 teaspoon                  | 1 teaspoon                    | 1 and 1/2 teaspoons              | 1 Tablespoon                     | 2 Tablespoons                            | 3 Tablespoons              |
| <b>Walnut Meal</b><br>Nuts.com        | 1 teaspoon                    | 2 teaspoons                   | 3 and 1/4 teaspoons              | 2 Tablespoons plus 1/2 teaspoon  | 1/4 cup                                  | 1/4 cup plus 2 Tablespoons |
| <b>Walnut Milk</b><br>Elmhurst        | 1 Tablespoon plus 2 teaspoons | 3 Tablespoons plus 1 teaspoon | 1/3 cup (2 and 2/3 fluid ounces) | 2/3 cup (5 and 1/3 fluid ounces) | 1 and 1/3 cups (10 and 2/3 fluid ounces) | 2 cups (16 fluid ounces)   |

Table E3 Cashew Food Protein Equivalents

| Food                                 | 300mg        | 600mg                         | 1000mg                       | 2000mg                        | 4000mg                        | 6000mg                         |
|--------------------------------------|--------------|-------------------------------|------------------------------|-------------------------------|-------------------------------|--------------------------------|
| <b>Whole Cashew</b><br>Sunshine      | 1 cashew     | 2 cashews                     | 3 and ½ cashews              | 7 cashews                     | 15 cashews                    | 22 cashews                     |
| <b>Cashew Flour/Meal</b><br>Nuts.com | ¾ teaspoon   | 1 and ½ teaspoons             | 2 and ½ teaspoons            | 1 Tablespoon plus 2 teaspoons | 3 Tablespoon plus 1 teaspoon  | 5 Tablespoons                  |
| <b>Cashew Flour</b><br>Hearthly      | ⅔ teaspoon   | 1 and ¼ teaspoons             | 2 teaspoons                  | 1 Tablespoon plus 1 teaspoon  | 2 Tablespoon plus 2 teaspoons | ¼ cup                          |
| <b>Cashew Butter</b><br>Kevala       | ⅓ teaspoon   | ¾ teaspoon                    | 1 and ¼ teaspoons            | 2 and ½ teaspoons             | 4 and ¾ teaspoons             | 2 and ½ Tablespoons            |
| <b>Cashew Milk</b><br>Elmhurst       | 4 teaspoons  | 2 Tablespoons plus 1 teaspoon | ¼ cup (2 fluid ounces)       | ½ cup (4 fluid ounces)        | 1 cup (8 fluid ounces)        | 1 and ½ cups (12 fluid ounces) |
| <b>Cashew Yogurt</b><br>Forager      | 1 Tablespoon | 2 Tablespoons                 | 3 Tablespoon plus 1 teaspoon | ¼ cup plus 2½ Tablespoons     | ¾ cup plus 1 Tablespoon       | 1 and ¼ cups                   |

Table E4. Hazelnut Food Protein Equivalents

| Food                                        | 300mg                  | 600mg                      | 1000mg                    | 2000mg                          | 4000mg                           | 6000mg                              |
|---------------------------------------------|------------------------|----------------------------|---------------------------|---------------------------------|----------------------------------|-------------------------------------|
| <b>Whole Hazelnut</b><br>Generic            | 1 and ½ nuts           | 2 and ½ nuts               | 4 and ½ nuts              | 9 nuts                          | 18 nuts                          | 27 nuts                             |
| <b>Dry Roasted Hazelnuts</b><br>Ken & June  | 2 nuts                 | 3 and ½ nuts               | 6 nuts                    | 12 nuts                         | 23 and ½ nuts                    | 35 nuts                             |
| <b>Hazelnut Butter</b><br>Vor Pure          | ½ teaspoon             | ¾ and ⅛<br>teaspoons       | 1 and ½<br>teaspoons      | 1 Tablespoon                    | 2 Tablespoons                    | 3 Tablespoons                       |
| <b>Hazelnut Spread</b><br>Nutella           | 1<br>Tablespoon        | 2<br>Tablespoons           | 3<br>Tablespoons          | 6<br>Tablespoons                | ¾ cup plus<br>1 Tablespoon       | 1 cup plus<br>3 Tablespoons         |
| <b>Hazelnut Flour</b><br>Amoretti or Ohnuts | 1 teaspoon             | 1 and ¾<br>teaspoons       | 1 Tablespoon              | 2 Tablespoons                   | ¼ cup                            | ¼ cup plus<br>2 Tablespoons         |
| <b>Hazelnut Flour</b><br>Holmquist          | ½ teaspoon             | 1 teaspoon                 | 1 and ½<br>teaspoons      | 1 Tablespoon<br>plus ⅛ teaspoon | 2 Tablespoons plus<br>¼ teaspoon | 3 Tablespoons<br>plus<br>¼ teaspoon |
| <b>Hazelnut Milk</b><br>Elmhurst            | 2 and ½<br>Tablespoons | ¼ cup plus 1<br>Tablespoon | ½ cup<br>(4 fluid ounces) | 1 cup<br>(8 fluid ounces)       | 2 cups<br>(16 fluid ounces)      | 3 cups<br>(24 fluid ounces)         |

Table E5. Retail Food Equivalent Product Changes\*

| <b>PRODUCT</b>        | <b>ACTION TAKEN</b>         | <b>REASON FOR CHANGE</b>                                                                                     |
|-----------------------|-----------------------------|--------------------------------------------------------------------------------------------------------------|
| Bread                 | Deleted and new brand added | Milk powder was added to formulation                                                                         |
| Ice Cream             | Deleted and new brand added | Protein content changed without change in volume/<br>serving and protein content was inconsistent regionally |
| Smooth Yogurt Cups    | Deleted and new brand added | Product no longer available                                                                                  |
| Cheese Cubes          | Deleted                     | Product no longer available                                                                                  |
| Cashew Yogurt         | Added                       | New product available                                                                                        |
| Cashew Flour          | Added                       | Product does not have risk of cross contact with other<br>tree nuts                                          |
| Hazelnut Flour        | Added                       | Product does not have risk of cross contact with other<br>tree nuts                                          |
| Organic peanut butter | Added                       | Participant request for organic product                                                                      |
| Peanut candy          | Added                       | Participant request for milk-free candy                                                                      |

\*after annual review

---

## E. FIGURE Legends E1-E8

Figures E1-E8 Provide participant education handouts for each allergen protein equivalent serving size from 300-6000mg

Figure E1. Peanut Participant Education Handouts

Figure E2. Peanut-limited milk-Participant Education Handouts

Figure E3. Milk Participant Education Handouts

Figure E4. Egg Participant Education Handouts

Figure E5. Wheat Participant Education Handouts

Figure E6. Walnut Participant Education Handouts

Figure E7. Cashew Participant Education Handouts

Figure E8. Hazelnut Education Handout

Journal Pre-proof
